# Supplementary material
Source: publisher figshare collection journal article supplement (https://acs.figshare.com/ndownloader/files/9118123)
Supplement: Supplementary file 1 [file 9118123]

# Electronic and Optical Properties of TiO<sub>2</sub> Solid-Solution Nanosheets for Bandgap Engineering: A Hybrid Functional Study

*Yanyu Liu<sup>1,2</sup>, Wei Zhou<sup>1,2\*</sup>, and Naoto Umezawa<sup>2</sup>*

<sup>1</sup>Department of Applied Physics, Tianjin Key Laboratory of Low Dimensional Materials Physics and Preparing Technology, School of Science, Tianjin University, Tianjin 300072, P.R. China

<sup>2</sup>International Center for Materials Nanoarchitectonics (MANA), National Institute for Materials Science, 1-1 Namiki, Tsukuba, Ibaraki 305-0044, Japan

\*To whom correspondence should be addressed.

E-mail: weizhou@tju.edu.cn. Phone: +86 (0)22 27408599 Fax: +86 (0)22 27406852.

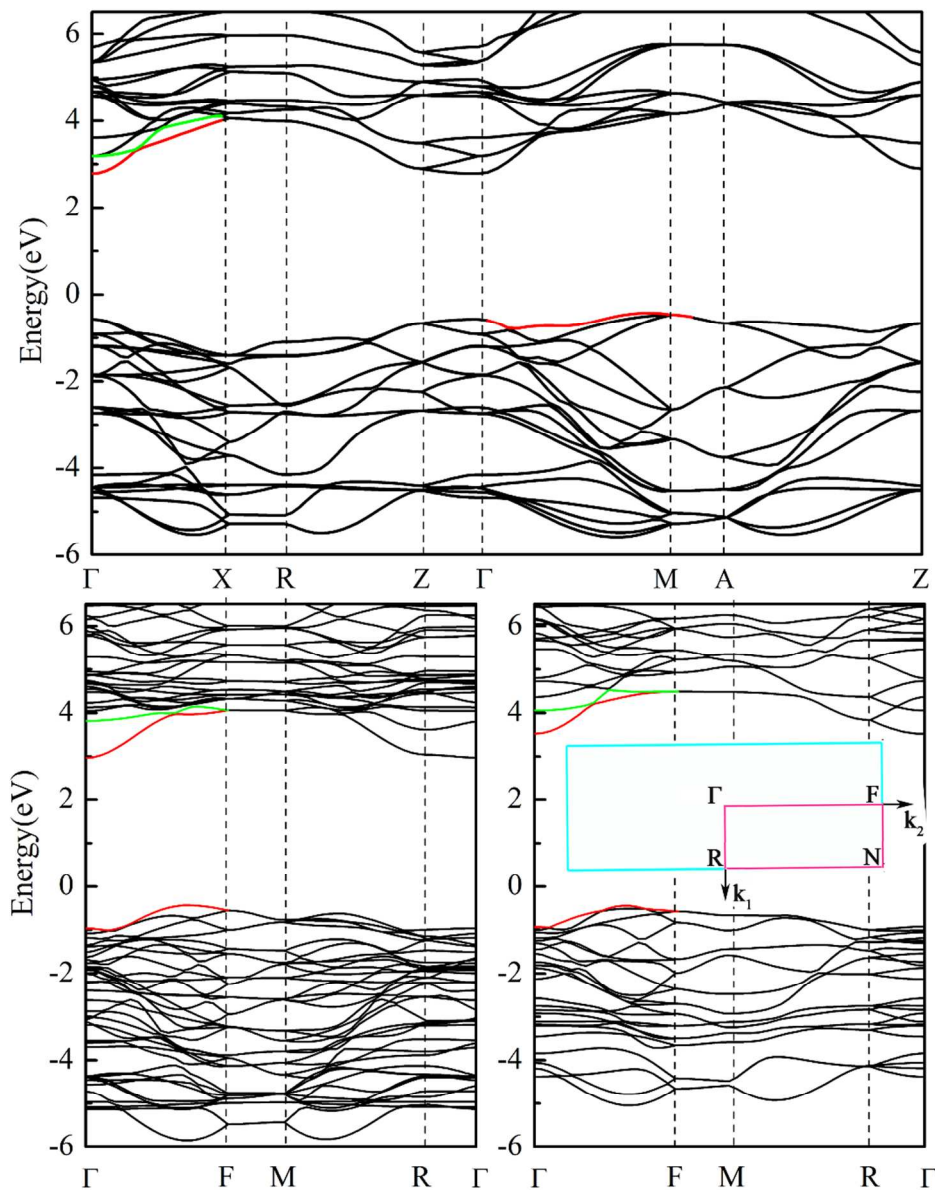

**Figure S1.** Band structures of the (a) bulk TiO<sub>2</sub>, (b) TiO<sub>2</sub> nanosheet with three atomic layers from HSE06. Inset: First Brillouin zone of TiO<sub>2</sub> nanosheets, (c) TiO<sub>2</sub> nanosheets with two atomic layers (the bulk TiO<sub>2</sub>, the coordinates of the symmetric k-points:  $\Gamma$  (0 0 0), X(0 0.5 0), R(0.5 0.5 0.5), Z(0 0 0.5), M(0.5 0.5 0), A(0.5 0.5 0.5) for the TiO<sub>2</sub> nanosheets:  $\Gamma$  (0 0 0), F(0 0.5 0), N(0.5 0.5 0), R(0.5 0 0)).

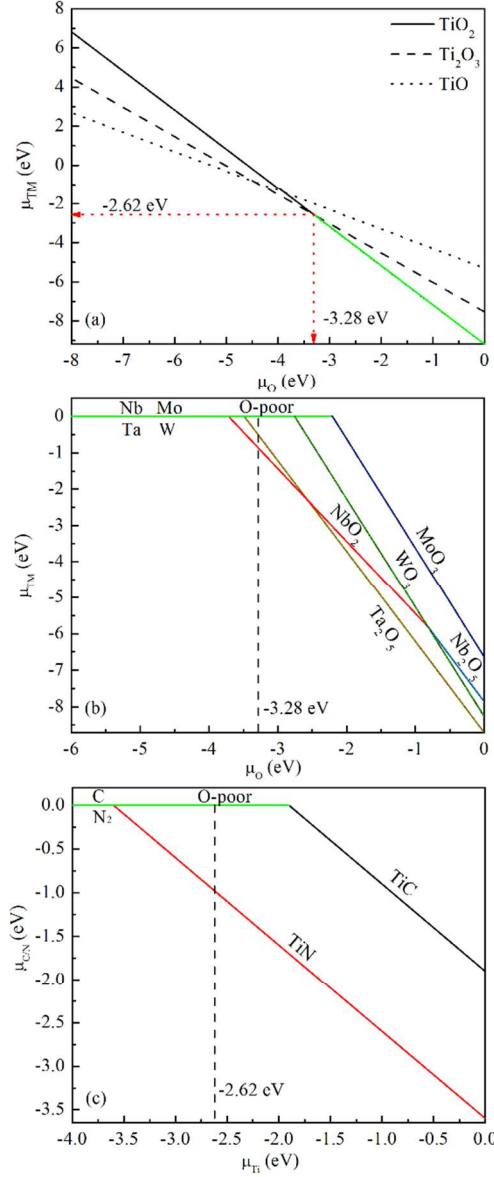

**Figure S2.** (a) Visualization of the three conditions described by eqn (2)–(4). These conditions are simultaneously satisfied in  $-3.28 \text{ eV} \geq \mu_O \geq 0 \text{ eV}$  and  $-9.18 \text{ eV} \geq \mu_{Ti} \geq -2.62 \text{ eV}$  as indicated by a green bold line. (b) the relationship between the transition metal chemical potentials  $\mu_{TM}$  and the O chemical potential  $\mu_O$ , as derived from the equilibrium growth of the host:  $\mu_{TM} = [H(TM_xO_y) - y\mu_O]/x$ ,  $\mu_O$  at  $-3.28 \text{ eV}$  and  $0 \text{ eV}$  represent the O-poor and O-rich condition, respectively. (c) the relationship between the C and N chemical potentials  $\mu_{C/N}$  and the Ti chemical potential  $\mu_{Ti}$ , as derived from the equilibrium growth of the host:  $\mu_C = H(TiC) - \mu_{Ti}$  and  $\mu_N = H(TiN) - \mu_{Ti}$ ,  $\mu_{Ti}$  at  $-2.62 \text{ eV}$  and  $-9.18 \text{ eV}$  represent the O-poor and O-rich condition, respectively.

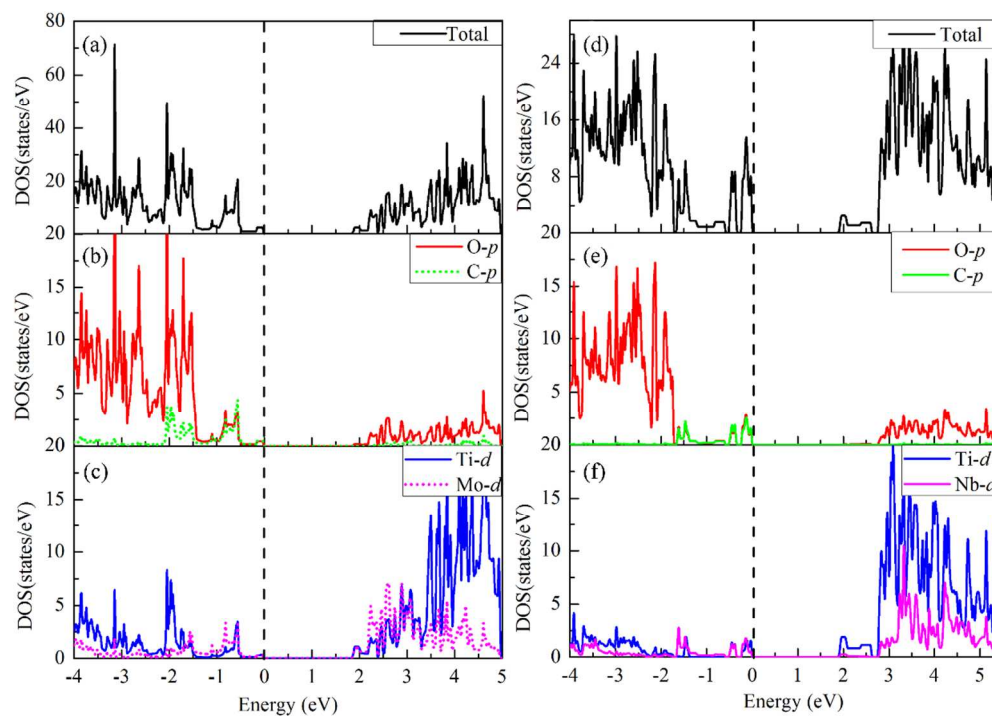

**Figure S3.** Total and projected DOS for (a)-(c)  $(\text{TiO}_2)_{2/3}(\text{MoOC})_{1/3}$  and (d)-(f)  $(\text{TiO}_2)_{2/3}(\text{Nb}_2\text{O}_3\text{C})_{1/3}$  solid solutions from HSE06.

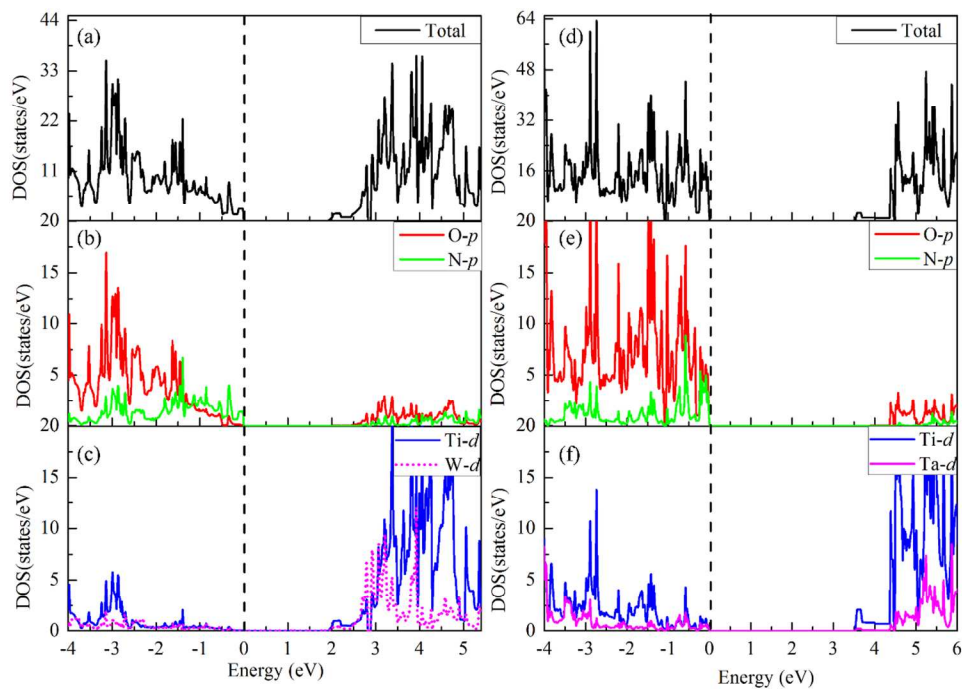

**Figure S4.** Total and projected DOS for (a)-(c)  $(\text{TiO}_2)_{2/3}(\text{WN}_2)_{1/3}$  and (d)-(f)  $(\text{TiO}_2)_{2/3}(\text{TaON})_{1/3}$  solid solutions from HSE06.

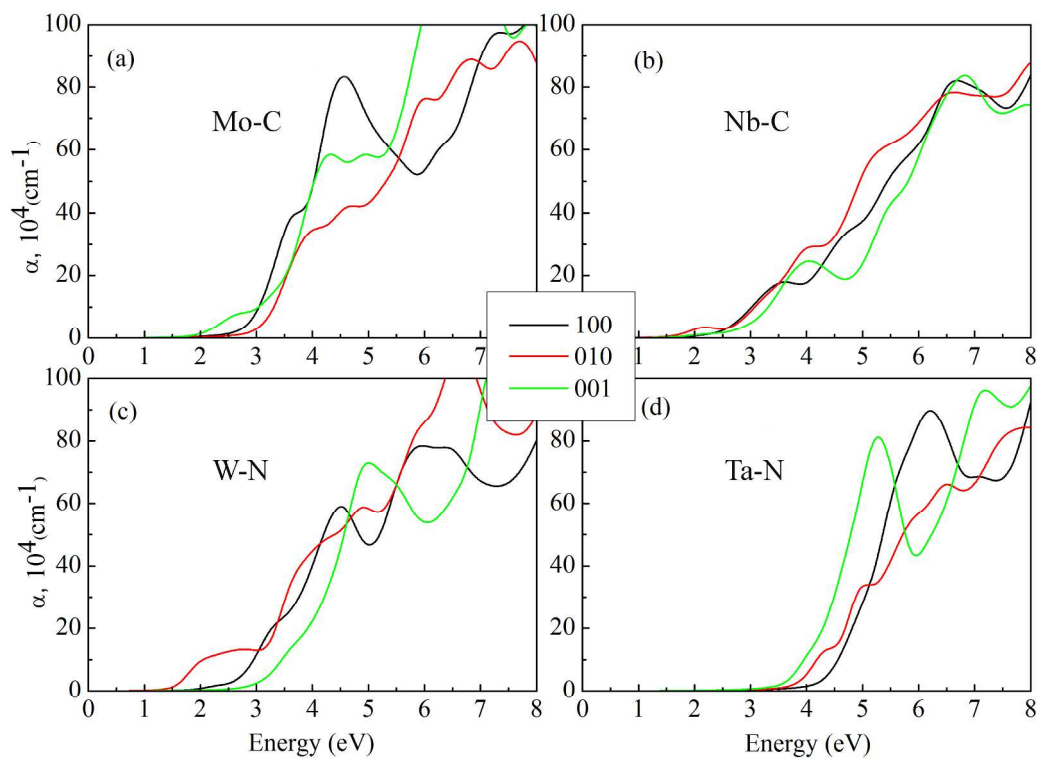

**Figure S5.** Optical properties of (a)  $(\text{TiO}_2)_{2/3}(\text{MoOC})_{1/3}$ , (b)  $(\text{TiO}_2)_{2/3}(\text{Nb}_2\text{O}_3\text{C})_{1/3}$ , (c)  $(\text{TiO}_2)_{2/3}(\text{WN}_2)_{1/3}$  and (d)  $(\text{TiO}_2)_{2/3}(\text{TaON})_{1/3}$  nanosheets from HSE06.
